# Supplementary material for: Long-latency reflex prolongation in obstructive sleep apnea suggests cortical sensorimotor slowing: a controlled neurophysiology study
Source: Research Square preprint supplement (doi:10.21203/rs.3.rs-8688923/v1), 2026-02-09
Supplement: Supplementary file 1 [file df63c425c2546cfc71fa8aa0.docx]

**Tables**

**Table 1. Comparison of demographic characteristics across groups**

|  | Groups | | | Total (N=60) | Test Statistic | **p-value** |
| --- | --- | --- | --- | --- | --- | --- |
| Control (n=21) | Mild OSAS (n=9) | Moderate-Severe OSAS (n=30) |
| Sex |  |  |  |  |  |  |
| ‎ ‎ ‎ ‎ ‎ ‎ Male | 8 (38,1) | 7 (77,8) | 21 (70) | 36 (60) | — | **0,042z** |
| ‎ ‎ ‎ ‎ ‎ ‎ Female | 13 (61,9) | 2 (22,2) | 9 (30) | 24 (40) |  |  |
| Age | 31 (25 - 53)a | 43 (27 - 54)ab | 52,5 (25 - 69)b | 43,5 (25 - 69) | 16,358 | **< 0,001x** |
| Height (cm) | 170,33 ± 8,24 | 172,33 ± 9,73 | 167,97 ± 11,89 | 169,47 ± 10,37 | 0,715 | 0,494y |
| Weight (kg) | 72,95 ± 14,76b | 83,33 ± 10,48ab | 84,93 ± 12,44a | 80,55 ± 13,98 | 5,239 | **0,008y** |
| BMI(Kg/ m²) | 24,55 (19,1-30,93)a | 28 (24,3 - 32,8)ab | 29,6 (23-41,9)b | 28,15(19,1-41,9) | 11,266 | **0,004x** |
| Arm (cm) | 54,5 (52 - 64) | 55 (51 - 62) | 55 (49 - 62) | 55 (49 - 64) | 0,458 | 0,795x |

† Fisher’s exact test with Monte Carlo correction; * Kruskal–Wallis H test; ‡ One-way ANOVA. Values are mean ± SD, median (minimum–maximum), or n (%). Groups sharing the same letter (a–b) are not significantly different. BMI: body mass index.

**Tablo 2A. Comparison of clinical findings across groups**

| H | 25,7 (23 - 28,4) | 25,35 (22,7 - 28,6) | 25,4 (22 - 30,6) | 25,6 (22 - 30,6) | 0,050 | 0,976x |
| --- | --- | --- | --- | --- | --- | --- |
| LLR1 | 38,65 ± 2,8 | 38,84 ± 2,17 | 39,69 ± 4,4 | 39,21 ± 3,63 | 0,505 | 0,606y |
| LLR2 | 50,4 (43,9 - 60,1) a | 52,15 (49,4 - 59,8) ab | 53,1 (33,5 - 65,3) b | 52,35 (33,5 - 65,3) | 8,516 | **0,014**x |
| LLR3 | 70,02 ± 5,5 | 74,16 ± 7,12 | 71,51 ± 6,95 | 71,2 ± 6,34 | 0,854 | 0,434y |
| H-LLR2 latency | 25,5 (12,1 - 34,3) a | 28,3 (21,6 - 35,5) ab | 27,1 (22,5 - 74,3) b | 26,5 (12,1 - 74,3) | 7,089 | **0,029**x |
| AHI | 2,9 (0,3 - 4,7) a | 10,4 (6,3 - 14,8) a | 25,55 (16,1 - 94,7) b | 20,7 (0,3 - 94,7) | 30,526 | **<0,001**x |
| REM-AHI | 2,55 (0,7 - 10,3) a | 8,8 (0 - 48) ab | 34,9 (0 - 86) b | 12,8 (0 - 86) | 8,601 | **0,014**x |
| Supine-AHI | 8,35 (1,4 - 16,1) a | 17,4 (0,8 - 98,5) a | 54,4 (3,5 - 130,9) b | 38,7 (0,8 - 130,9) | 18,619 | **<0,001**x |
| Epworth | 5,5 ± 3,81 a | 8,11 ± 2,26 a | 15,1 ± 4,11 b | 10,96 ± 5,83 | 37,861 | **<0,001**y |
| Min spO2 | 86,5 (82 - 91) a | 84 (79 - 91) a | 80 (56 - 88) b | 82 (56 - 91) | 12,135 | **0,002**x |
| t<%90(dk) | 4,25 (0 - 58,1) | 9,7 (0 - 75) | 19,75 (0,8 - 387) | 13,6 (0 - 387) | 6,286 | **0,043**x |
| t<%90(%) | 0,95 (0 - 12,4) | 2,1 (0 - 17,6) | 4,75 (0,2 - 83,7) | 3 (0 - 83,7) | 6,711 | **0,035**x |

x Kruskal Wallis H test; y One-way ANOVA; Mean ± SD; Median (minimum–maximum); Groups sharing the same letter (a–b) are not significantly different.

**Table 2B. Detection rates of LLR across groups**

|  | Groups | | | Total (n=60) | px |
| --- | --- | --- | --- | --- | --- |
| Control (n=21) | Mild OSAS (n=9) | Moderate-Severe OSAS (n=30) |
| LLR1 grup |  |  |  |  |  |
| ‎ ‎ ‎ ‎ ‎ ‎ Present | 19 (90,5) | 8 (88,9) | 28 (93,3) | 55 (91,7) | 0,848 |
| ‎ ‎ ‎ ‎ ‎ ‎ Absent | 2 (9,5) | 1 (11,1) | 2 (6,7) | 5 (8,3) |  |
| LLR2 grup |  |  |  |  |  |
| ‎ ‎ ‎ ‎ ‎ ‎ Present | 21 (100) | 7 (87,5) | 27 (90) | 55 (93,2) | 0,242 |
| ‎ ‎ ‎ ‎ ‎ ‎ Absent | 0 (0) | 1 (12,5) | 3 (10) | 4 (6,8) |  |
| LLR3 grup |  |  |  |  |  |
| ‎ ‎ ‎ ‎ ‎ ‎ Present | 17 (81) | 6 (66,7) | 17 (56,7) | 40 (66,7) | 0,176 |
| ‎ ‎ ‎ ‎ ‎ ‎ Absent | 4 (19,1) | 3 (33,3) | 13 (43,3) | 20 (33,3) |  |

x Fisher’s Exact test with Monte Carlo correction; values are given as frequency (%).

**Table 3. Correlation between LLR2 and clinical parameters across groups**

|  | LLR2 (Control ) | | LLR2 (Mild OSAS) | | LLR2 (Moderate-Severe OSAS) | |
| --- | --- | --- | --- | --- | --- | --- |
| r | p | r | p | r | p |
| AHI | -0,255x | 0,626 | 0,165x | 0,696 | -0,029z | 0,887 |
| REM-AHI | 0,331x | 0,522 | 0,707z | 0,050 | 0,068z | 0,738 |
| Supine-AHI | -0,058x | 0,914 | 0,024x | 0,955 | -0,100z | 0,620 |
| Rem-dependent | 0,135y | 0,799 | 0,289y | 0,487 | 0,153y | 0,445 |
| Body position dependent | 0,135y | 0,799 | 0,216y | 0,608 | 0,092y | 0,648 |
| Epworth | -0,380x | 0,119 | 0,538x | 0,169 | -0,009z | 0,964 |
| Min spO2 | 0,031x | 0,954 | -0,845x | **0,008** | 0,153z | 0,446 |
| t<%90(dk) | 0,086z | 0,919 | 0,518z | 0,188 | -0,262z | 0,187 |
| t<%90(%) | 0,086z | 0,919 | 0,518z | 0,188 | -0,267z | 0,179 |

x Pearson’s correlation; y Point-biserial correlation z Spearman’s rho correlation
